# Supplementary material
Source: publisher site journal article supplement (https://www.spandidos-publications.com/3036/downloadSupplementary)
Supplement: Supplementary file 1 [file downloadSupplementary]

## Sheet: 工作表1
	Table SII. Raw values of microarchitecture factors of the subchondral trabecular bone.
	Factors	Location	Raw values
	BMD	Male Medial	1	2	3	4	5	6	7	8	9	10	11
		Animal 1	0.47539	0.63477	0.75619	0.66156	0.78246	0.86022	0.78671	0.89195	0.76068	0.77361	0.85405
		Animal 2	0.60439	0.60033	0.76295	0.79301	0.85428	0.91594	0.94448	0.90118	0.87205	0.81135	0.94887
		Animal 3	0.59106	0.66038	0.83613	0.81579	0.80163	0.8821	0.79628	0.90355	0.80776	0.76921	0.90805
		Animal 4	0.53355	0.55801	0.64004	0.93079	0.83477	0.73821	0.85062	0.9066	0.87803	0.85603	0.96584
		Animal 5	0.56079	0.56265	0.7325	0.69146	0.74268	0.91447	0.82654	0.78552	1.00239	0.68343	0.82935
		Animal 6	0.47511	0.69342	0.79353	0.78468	0.89601	0.83256	0.89409	0.94448	0.89619	0.72523	0.80758
		Male Lateral	1	2	3	4	5	6	7	8	9	10	11
		Animal 1	0.50307	0.56104	0.67747	0.73405	0.70093	0.74422	0.73911	0.85259	0.7213	0.63893	0.91776
		Animal 2	0.56478	0.57819	0.66062	0.83146	0.81675	0.68284	0.83783	0.82312	0.70822	0.65811	0.79603
		Animal 3	0.51835	0.62531	0.81598	0.70712	0.78821	0.77982	0.72354	0.71335	0.73089	0.69011	0.79464
		Animal 4	0.52778	0.53112	0.72551	0.79468	0.62593	0.74658	0.81126	0.90388	0.73493	0.90257	0.87027
		Animal 5	0.59123	0.55506	0.68254	0.6919	0.7292	0.70152	0.77352	0.78576	0.71507	0.60792	0.74846
		Animal 6	0.40924	0.68256	0.82138	0.74221	0.7684	0.83395	0.81076	0.80813	0.69035	0.68593	0.94364
		Female Medial	1	2	3	4	5	6	7	8	9	10	11
		Animal 1	0.56679	0.61877	0.74475	0.75073	0.70417	0.84459	0.80708	0.90469	0.88033	0.79974	0.77216
		Animal 2	0.48898	0.59048	0.70289	0.78813	0.68021	0.78462	0.79724	0.98409	0.8876	0.73231	0.85922
		Animal 3	0.51737	0.67718	0.60982	0.69667	0.88418	0.78774	0.76952	0.71343	0.85283	0.8838	0.78377
		Animal 4	0.53961	0.65902	0.68573	0.64964	0.79493	0.86481	0.79062	0.90474	0.7541	0.96985	0.96822
		Animal 5	0.56698	0.61088	0.58253	0.74559	0.79622	0.82862	0.78603	0.85503	0.85718	0.825	0.97844
		Animal 6	0.50213	0.6724	0.74547	0.9022	0.83509	0.83409	0.66845	0.81875	0.82963	0.81769	0.87296
		Female Lateral	1	2	3	4	5	6	7	8	9	10	11
		Animal 1	0.63249	0.48299	0.67722	0.66213	0.61758	0.77664	0.77344	0.76619	0.90492	0.7423	0.75691
		Animal 2	0.4802	0.53389	0.63083	0.73625	0.69919	0.65413	0.82954	0.93799	0.89128	0.71762	0.75144
		Animal 3	0.48129	0.72631	0.61566	0.61936	0.86755	0.76554	0.67728	0.79105	0.81305	0.80726	0.65622
		Animal 4	0.6157	0.68161	0.75078	0.87379	0.77119	0.85317	0.78272	0.81088	0.67451	0.79063	0.66531
		Animal 5	0.61877	0.55574	0.58098	0.69956	0.69137	0.71218	0.71613	0.71062	0.81359	0.75907	0.84945
		Animal 6	0.45357	0.64917	0.75006	0.64734	0.74949	0.81681	0.7189	0.79448	0.72251	0.69609	0.80873
	BV/TV	Male Medial	1	2	3	4	5	6	7	8	9	10	11
		Animal 1	19.7009	34.6386	37.8459	27.1256	39.2763	45.7569	37.4267	43.5057	31.5889	33.5237	39.4073
		Animal 2	31.5494	31.6337	38.6152	41.045	48.1962	52.4143	54.0293	46.6145	41.3218	36.9514	48.0212
		Animal 3	30.6997	35.7179	45.8357	42.3306	40.4559	47.8137	39.1351	45.15	36.1918	34.1854	44.0526
		Animal 4	25.689	27.2221	26.2725	55.8179	44.9982	33.9246	44.1313	46.2956	44.1091	40.8314	51.2819
		Animal 5	28.0155	26.4221	34.6883	30.786	35.6616	53.9254	39.5296	33.3076	55.7947	26.3308	36.2549
		Animal 6	20.6951	43.5492	42.3058	38.9483	50.6807	42.418	48.0946	50.5687	43.1236	28.632	35.1518
		Male Lateral	1	2	3	4	5	6	7	8	9	10	11
		Animal 1	21.3281	26.5624	30.5539	34.6301	30.7771	35.0442	31.255	40.5378	27.9293	21.515	46.45
		Animal 2	27.0411	30.0714	28.1587	46.2935	43.1221	29.3521	43.1362	36.5928	26.371	23.5709	33.6429
		Animal 3	23.3471	33.2929	44.6754	29.9787	40.4115	38.2167	29.1767	27.0587	30.285	27.2464	34.8919
		Animal 4	23	24.9011	34.6351	41.0569	25.3753	35.7591	39.5613	45.3944	28.9218	45.2979	41.5066
		Animal 5	31.1909	26.9007	30.1565	30.782	33.9522	31.4081	35.3411	33.477	26.109	21.0636	28.7199
		Animal 6	15.004	41.4823	42.3058	35.8511	37.1328	43.5793	39.3373	35.9874	24.7668	21.6218	50.6643
		Female Medial	1	2	3	4	5	6	7	8	9	10	11
		Animal 1	28.6547	33.1759	36.0841	36.7062	32.7249	45.1536	39.0141	43.7985	43.3688	35.7674	32.0718
		Animal 2	21.0318	29.7981	32.5349	41.4993	30.2953	39.7786	37.8334	52.9418	43.5957	31.2245	40.5953
		Animal 3	23.2596	38.0484	24.8866	31.3525	50.0662	39.8399	35.0311	27.3554	40.1198	43.5465	36.0654
		Animal 4	25.766	37.6572	31.3173	28.1434	41.7341	46.9825	38.4213	44.9141	31.8223	51.7316	53.4336
		Animal 5	28.8541	33.8463	23.5737	37.1353	40.6631	42.3692	38.0293	39.2328	42.4323	37.5806	50.6948
		Animal 6	22.5128	40.0684	37.8844	55.6114	46.4478	43.2042	28.0422	36.8557	37.0391	38.5744	43.0543
	Tb.Th	Male Medial	1	2	3	4	5	6	7	8	9	10	11
		Animal 1	0.08589	0.11154	0.12584	0.12144	0.14124	0.17158	0.13709	0.11316	0.10214	0.11992	0.12925
		Animal 2	0.0912	0.11513	0.12695	0.13097	0.14623	0.16213	0.1418	0.12949	0.13178	0.13075	0.13396
		Animal 3	0.09931	0.13603	0.13347	0.12172	0.13943	0.17837	0.1186	0.15697	0.13614	0.12204	0.14286
		Animal 4	0.10054	0.11888	0.1221	0.16336	0.13916	0.12903	0.11664	0.12608	0.12942	0.10122	0.13731
		Animal 5	0.11016	0.11317	0.11446	0.13187	0.13509	0.16424	0.13781	0.10857	0.15051	0.09839	0.10114
		Animal 6	0.10125	0.12645	0.13182	0.13947	0.15955	0.14666	0.12805	0.12175	0.1263	0.09144	0.10739
		Male Lateral	1	2	3	4	5	6	7	8	9	10	11
		Animal 1	0.07894	0.09249	0.11262	0.10087	0.1224	0.12693	0.11132	0.10289	0.10151	0.0878	0.10977
		Animal 2	0.16843	0.10886	0.09983	0.12636	0.13684	0.13097	0.10523	0.11062	0.09626	0.09101	0.10659
		Animal 3	0.09041	0.11518	0.11785	0.10156	0.13492	0.14712	0.09782	0.10701	0.10428	0.09442	0.11924
		Animal 4	0.07963	0.10496	0.11282	0.1256	0.10149	0.1233	0.11126	0.11948	0.09745	0.0955	0.1102
		Animal 5	0.14225	0.11434	0.10596	0.11731	0.12399	0.12203	0.11787	0.11481	0.10728	0.09327	0.07946
		Animal 6	0.08491	0.12166	0.13182	0.12477	0.12053	0.13719	0.10998	0.09637	0.09824	0.07075	0.11619
		Female Medial	1	2	3	4	5	6	7	8	9	10	11
		Animal 1	0.09966	0.12002	0.12085	0.1245	0.12888	0.14821	0.1272	0.13981	0.14053	0.11777	0.11777
		Animal 2	0.08881	0.10914	0.1137	0.13165	0.12462	0.14675	0.11641	0.13707	0.11088	0.12268	0.14613
		Animal 3	0.08733	0.11794	0.1053	0.1085	0.14393	0.13768	0.12193	0.10377	0.12815	0.14906	0.13403
		Animal 4	0.09701	0.13744	0.1149	0.11181	0.13923	0.15747	0.12683	0.11985	0.10774	0.15201	0.12703
		Animal 5	0.10927	0.12025	0.10329	0.1282	0.13271	0.12434	0.13102	0.11441	0.12087	0.13522	0.13403
		Animal 6	0.08952	0.12593	0.11844	0.14349	0.13077	0.14367	0.12049	0.10761	0.09676	0.12097	0.12782
	Tb.N	Male Medial	1	2	3	4	5	6	7	8	9	10	11
		Animal 1	2.29379	3.10547	3.00756	2.23371	2.78086	2.66682	2.73005	3.84468	3.09278	2.7956	3.04887
		Animal 2	3.45946	2.74758	3.04174	3.13401	3.29582	3.23295	3.81019	3.59997	3.13573	2.82605	3.58471
		Animal 3	3.09126	2.62575	3.43408	3.4777	2.90149	2.68066	3.29987	2.87643	2.65852	2.80115	3.08351
		Animal 4	2.55503	2.28997	2.15171	3.41683	3.23365	2.62929	3.78342	3.67204	3.40818	4.03404	3.73481
		Animal 5	2.54312	2.33478	3.03058	2.33465	2.63991	3.28335	2.86849	3.0677	3.70707	2.67619	3.58453
		Animal 6	2.04404	3.44398	3.2094	2.79253	3.17655	2.89227	3.75606	4.15355	3.41436	3.13113	3.27321
		Male Lateral	1	2	3	4	5	6	7	8	9	10	11
		Animal 1	2.70183	2.87179	2.71306	3.43303	2.51449	2.76093	2.80765	3.93978	2.75127	2.45032	4.23155
		Animal 2	1.60551	2.76247	2.82065	3.66373	3.15124	2.24121	4.09941	3.30811	2.7395	2.59005	3.15622
		Animal 3	2.5824	2.89043	3.79089	2.95173	2.9952	2.59771	2.98278	2.52865	2.90426	2.88575	2.92614
		Animal 4	2.88851	2.37241	3.06982	3.26873	2.50038	2.90012	3.55574	3.79926	2.96796	4.74338	3.76664
		Animal 5	2.19265	2.35265	2.84596	2.62405	2.73821	2.5737	2.99826	2.91587	2.43368	2.25841	3.6142
		Animal 6	1.76699	3.40982	3.2094	2.87328	3.0807	3.17656	3.57666	3.73445	2.52103	3.05606	4.36053
		Female Medial	1	2	3	4	5	6	7	8	9	10	11
		Animal 1	2.87514	2.76419	2.98581	2.94839	2.5391	3.04668	3.06719	3.13277	3.08604	3.03709	2.72326
		Animal 2	2.36822	2.73027	2.86148	3.15236	2.43096	2.71065	3.25008	3.86236	3.93176	2.54521	2.778
		Animal 3	2.66339	3.22609	2.36335	2.88953	3.47848	2.89362	2.87298	2.63609	3.13062	2.92143	2.69078
		Animal 4	2.6559	2.73985	2.72562	2.51697	2.99745	2.98357	3.02939	3.74747	2.95362	3.40325	4.20654
		Animal 5	2.64055	2.81473	2.28226	2.89677	3.06412	3.40753	2.90255	3.42913	3.51044	2.77926	3.78236
		Animal 6	2.51476	3.1817	3.19852	3.87558	3.55198	3.00726	2.3274	3.42488	3.82807	3.18865	3.36827
	SMI	Male Medial	1	2	3	4	5	6	7	8	9	10	11
		Animal 1	1.83961	1.412	0.57783	1.37194	0.86266	1.19889	0.48917	-0.10112	0.01109	0.21082	0.42532
		Animal 2	1.35862	1.28292	0.49002	0.6729	0.16964	1.04273	-0.51583	-0.56944	0.45016	0.42076	0.06079
		Animal 3	1.33861	1.4603	0.36733	0.71401	0.88474	1.32532	0.26355	0.25282	0.55357	0.20333	0.61593
		Animal 4	1.46302	1.45184	1.21118	0.16083	0.42338	1.33325	-0.22819	-0.30674	-0.20401	-0.31666	-0.52669
		Animal 5	1.29859	1.55247	0.80402	1.11453	0.80039	0.10084	1.2257	0.12683	-1.06932	0.58107	0.29501
		Animal 6	1.78171	0.6661	-0.06061	1.09042	0.65874	1.417	-0.18037	-1.0358	0.46	0.45623	0.07699
		Male Lateral	1	2	3	4	5	6	7	8	9	10	11
		Animal 1	1.79851	1.70898	0.85071	0.62604	1.06111	1.12661	1.02896	-0.11493	0.80771	0.92328	-0.34284
		Animal 2	2.32269	1.34228	0.91777	0.18781	0.45075	1.39944	-0.22621	0.54057	1.03419	0.89379	0.46981
		Animal 3	1.66508	1.34601	0.15027	1.46472	0.46469	1.25869	1.24532	0.92363	0.57647	0.60369	0.37837
		Animal 4	1.71158	1.35824	0.84201	0.69748	1.0249	0.96073	0.16131	-0.12712	0.77131	-0.53214	0.05785
		Animal 5	1.48011	1.73316	0.94862	1.15812	1.16662	1.0643	0.66081	0.54311	0.92304	0.55093	0.53666
		Animal 6	1.96043	0.89026	-0.06061	0.68626	1.07373	0.87481	0.33119	0.22429	0.81408	1.46937	-1.24461
		Female Medial	1	2	3	4	5	6	7	8	9	10	11
		Animal 1	1.52162	1.13338	0.93915	0.88103	1.02316	0.81336	0.61834	0.48641	0.41021	0.47052	0.72397
		Animal 2	1.63814	1.26873	0.9709	0.46085	1.19926	0.87246	0.40679	-0.27874	-0.30419	0.61197	0.66064
		Animal 3	1.56029	1.17108	1.10091	1.1391	0.07628	0.75234	0.81137	1.021	0.49399	0.35771	0.34103
		Animal 4	1.5488	1.09386	1.00978	0.84453	0.61947	0.69729	0.27163	0.1173	0.66765	0.01561	-0.91724
		Animal 5	1.48194	1.11419	1.07455	0.77081	0.73398	1.1195	0.52517	0.46099	-0.26608	0.18029	-0.08649
		Animal 6	1.46358	0.97336	0.47923	-0.71384	0.02547	0.90778	1.09692	0.33869	-0.01196	0.0342	-0.15643
		Female Lateral	1	2	3	4	5	6	7	8	9	10	11
		Animal 1	1.32693	1.69636	1.14305	1.30751	1.11137	1.22245	1.19263	0.50427	-0.03956	0.45608	0.37402
		Animal 2	1.73635	1.51282	1.02625	0.81889	0.95693	1.20742	0.3283	-0.54792	-0.2227	0.684	0.83774
		Animal 3	1.72102	0.61917	1.07317	1.19941	-0.08051	1.13116	0.87375	0.43558	0.13215	0.64894	0.77172
		Animal 4	1.25193	0.73122	0.61935	0.39693	0.67729	0.37295	0.66003	0.68564	0.97295	0.51309	1.08685
		Animal 5	1.26271	1.44075	1.2738	0.85285	0.9779	1.18671	1.08039	0.73139	0.62766	0.86377	1.297
		Animal 6	1.78513	1.05364	0.56799	1.16484	0.68878	0.89278	0.66091	0.4655	0.55616	0.97656	0.36157
	Tb.Pf	Male Medial	1	2	3	4	5	6	7	8	9	10	11
		Animal 1	10.5772	-0.2867	-4.47892	1.18454	-4.18327	-2.00791	-5.75843	-11.8763	-10.5104	-5.78547	-5.78572
		Animal 2	4.31595	2.36313	-4.33824	-3.32039	-6.50372	-4.05964	-11.2873	-11.6876	-5.63361	-4.27737	-8.75254
		Animal 3	3.7855	2.65554	-4.96501	-10.066	-4.21559	-1.02198	-8.25735	-6.40415	-2.58397	-5.7957	-5.81524
		Animal 4	3.48679	4.59905	2.11056	-7.27227	-4.97661	0.51548	-9.8092	-11.7432	-8.78626	-12.1839	-13.0202
		Animal 5	3.47597	5.57806	-3.04123	0.4853	-3.09576	-8.67761	0.13528	-10.151	-15.8724	-4.76068	-9.12326
		Animal 6	8.15857	-4.16902	-8.06287	-0.91413	-5.90991	0.53974	-10.524	-16.2899	-8.00163	-6.01611	-9.30268
		Male Lateral	1	2	3	4	5	6	7	8	9	10	11
		Animal 1	10.2041	4.18871	-1.09975	-4.817	0.15201	-0.68764	-4.49265	-10.7091	-2.28271	-2.15885	-12.2707
		Animal 2	8.66372	2.4911	-1.53912	-7.04666	-5.0421	2.56023	-13.5482	-5.56137	-1.00438	-1.05532	-4.66764
		Animal 3	7.82854	2.33746	-7.071	-2.30067	-9.45083	-1.43859	-1.90881	-0.16524	-2.89903	-5.37344	-5.03855
		Animal 4	7.04662	4.1777	-1.1818	-4.05313	1.37818	-2.18076	-8.97098	-9.63973	-3.36729	-17.4776	-10.3499
		Animal 5	2.46326	5.87193	-0.87918	0.89256	0.07251	0.65812	-3.60279	-4.08035	-1.50193	-5.46485	-7.64789
		Animal 6	11.6054	-2.00315	-8.06287	-2.98063	-0.67661	-2.1074	-6.64417	-7.85652	-2.46001	2.46236	-17.3593
		Female Medial	1	2	3	4	5	6	7	8	9	10	11
		Animal 1	5.51448	2.25956	0.4934	-0.88958	0.74189	-3.93483	-4.08153	-4.57184	-3.73528	-4.00767	-1.49408
		Animal 2	8.4983	3.11093	0.80247	-4.15353	1.93687	-1.8669	-5.23653	-13.4509	-13.7205	-1.75201	-2.78169
		Animal 3	7.09224	1.50719	2.30915	-2.56645	-9.09773	-4.63854	-1.78556	-0.55599	-4.36894	-4.27483	-4.89629
		Animal 4	6.82725	0.57987	0.66171	-0.04912	-3.8752	-3.3127	-6.17694	-8.00277	-4.77096	-7.40274	-15.35
		Animal 5	5.46867	0.35605	2.06771	-2.39359	-3.13806	-7.48437	-3.55456	-7.6716	-8.72884	-6.48109	-15.9534
		Animal 6	6.40184	-1.34159	-3.17041	-12.9837	-7.21378	-3.0286	1.32831	-6.33899	-15.4769	-6.41337	-11.5649
		Female Lateral	1	2	3	4	5	6	7	8	9	10	11
		Animal 1	0.79451	7.82622	1.82484	3.32484	2.4148	-0.35405	-0.59647	-3.83612	-6.3138	-6.02456	-5.80533
		Animal 2	10.0369	6.22369	1.58283	-0.83608	0.68797	1.0944	-6.1157	-13.0919	-12.2978	-2.26729	-0.90744
		Animal 3	9.08488	-3.81084	2.55027	1.74893	-8.62757	-1.01761	-1.05807	-5.47505	-6.79515	-1.66546	-0.40731
		Animal 4	1.49798	-3.00572	-1.73871	-5.68297	-1.98537	-5.58227	-3.17781	-3.09336	-0.49367	-3.72532	-0.66124
		Animal 5	1.34221	3.9497	3.55115	-2.90594	-0.21726	-3.45529	-1.68688	-3.13359	-5.41992	-1.35807	-4.58161
		Animal 6	10.1102	0.25536	-3.11721	0.10456	-3.11876	-2.15818	-2.49853	-5.23998	-8.07177	-1.12945	-6.19224
	DA	Male Lateral	1	2	3	4	5	6	7	8	9	10	11
		Animal 1	1.61326	1.49116	1.44888	1.5406	1.40987	1.42795	1.41735	1.43968	1.47716	1.61219	1.39574
		Animal 2	1.33358	1.43742	1.45745	1.47587	1.2692	1.5702	1.26927	1.5233	1.53223	1.80902	1.51493
		Animal 3	1.90079	1.67048	1.26603	1.28124	1.21049	1.43694	1.48857	1.49678	1.60209	1.65282	1.39258
		Animal 4	1.55031	1.85011	1.37751	1.30855	1.87742	1.3627	1.32704	1.19431	1.49494	1.49509	1.29452
		Animal 5	1.419	1.45854	1.41217	1.67576	1.24162	1.38318	1.40389	1.47187	1.63995	1.71554	1.4476
		Animal 6	1.87063	1.33512	1.15986	1.4463	1.5597	1.48425	1.38819	1.36489	1.50944	1.58756	1.20461
		Female Medial	1	2	3	4	5	6	7	8	9	10	11
		Animal 1	1.41229	1.45659	1.46198	1.38292	1.26888	1.53762	1.30847	1.20012	1.19174	1.22445	1.24277
		Animal 2	1.63487	1.45257	1.50593	1.31287	1.35298	1.30035	1.30516	1.16015	1.32416	1.30458	1.38297
		Animal 3	1.82292	1.33065	1.3847	1.27482	1.24869	1.18211	1.45684	1.22515	1.11421	1.26532	1.33382
		Animal 4	1.42759	1.21296	1.31693	1.37608	1.17562	1.27344	1.29622	1.38279	1.24275	1.44685	1.23535
		Animal 5	1.32597	1.27863	1.34965	1.26112	1.34201	1.12578	1.34183	1.1821	1.23237	1.25181	1.23343
		Animal 6	1.45227	1.22367	1.30406	1.25678	1.15112	1.1415	1.43832	1.38182	1.25255	1.25114	1.36504
	Note:BV/TV, bone volume fraction; Tb. Th, trabecular thickness; Tb. N, trabecular number; SMI, structure model index; Tb. Pf, trabecular bone pattern factor;
	DA, degree of anisotropy; BMD, the bone mineral density.
	1 to 11	Represents ages ( months)
